# Supplementary material for: An unprecedented oxalate-functionalized Ta/W polyoxometalate enabling the self-assembly of a 2D composite for catalytic hydrogenation
Source: Royal Society of Chemistry journal article supplement (doi:10.1039/d4qi01551g), 2024-01-01
Supplement: d4qi01551g1.pdf [file d4qi01551g1.pdf]

## Supporting Information

### Table of contents

|                                                                                 |           |
|---------------------------------------------------------------------------------|-----------|
| <b>S1 Experimental procedures</b> .....                                         | <b>1</b>  |
| <b>S2 X-ray crystallography</b> .....                                           | <b>2</b>  |
| <b>S3 Structural representations</b> .....                                      | <b>4</b>  |
| <b>S4 Bond valence calculations of the C<sub>2</sub>O<sub>4</sub>-POM</b> ..... | <b>5</b>  |
| <b>S5 Characterization of the C<sub>2</sub>O<sub>4</sub>-POM</b> .....          | <b>7</b>  |
| <b>S6 Characterization of Pd/(C<sub>2</sub>O<sub>4</sub>-POM)@rGO</b> .....     | <b>10</b> |
| <b>S7 Catalytic Hydrogenation of Olefins</b> .....                              | <b>14</b> |
| <b>S8 Computational details</b> .....                                           | <b>17</b> |
| <b>S9 References</b> .....                                                      | <b>17</b> |

## S1 Experimental procedures

### 1.1 Materials and Instruments

The precursor  $K_5Na_4[P_2W_{15}(TaO_2)_3O_{59}] \cdot 17H_2O$  was synthesized according to the procedure described in our previous report.<sup>1</sup>  $PdCl_2$  was purchased from Macklin Chemical Company. Graphene oxide (GO) (10 mg/mL) was purchased from Aladdin Chemical Company. All the other reagents were obtained commercially and used without further purification.

**FT-IR analysis** in ATR mode was performed by a Perkin Elmer Spectrum 400 FT-IR/FT-FIR Spectrometer equipped with ATR module in the range of 400–4000  $cm^{-1}$  at room temperature.

**UV-vis** was carried out in the range of 200–800 nm on a China Cary 100 Ultraviolet spectrophotometer.

**Powder X-ray diffraction (pXRD)** measurements were performed on a Panalytical X'Pert3 Powder diffractometer with graphite monochromatized  $Cu K\alpha$  radiation ( $\lambda = 0.1541$  nm, 40 KV, 150 mA) at 298 K.

**Elemental analyses** for Na, P, Ta, W and Pd were determined with a Agilent 7800(MS) ICP atomic emission spectrometer. Elemental analysis for C was performed on a Vario EL cube elemental analyzer.

**Thermal analyses** were performed on a Netzsch 449C thermal analyzer. The sample was heated to 800 °C with a heating rate of 5 °C/min, under an  $N_2$  atmosphere.

**Scanning electron microscope (SEM)** analysis was conducted on a ZEISS GeminiSEM 300 scanning electron microscope equipped with a super energy-dispersive spectrometer (EDS).

**High-resolution transmission electron microscopy (HRTEM)** analysis was conducted on a FEI Talos F200x transmission electron microscope equipped with mapping. TEM samples were prepared by casting several drops of a sample solution onto copper-mesh TEM grid mounted with a holey carbon film.

**Raman spectra** were obtained on a LabRAMHR Evolution 4000 spectrometer with 532 nm wavelength incident laser light.

**X-ray photoelectron spectroscopy (XPS)** measurements were performed on Thermo Fisher Scientific ESCALAB250Xi X-ray photoelectron spectroscopy.

**In situ X-ray photoelectron spectra (in situ XPS)** were recorded using an ESCALAB 250Xi spectrometer (Thermo Scientific) with a monochromatic Al anode  $K\alpha$  radiation (1486.6 eV), and the charging effects were corrected by setting the C1s binding energy of the adventitious carbon to 284.8 eV. Prior to the measurement, the sample of  **$Pd/(C_2O_4-POM)@rGO$**  was kept in a pretreatment chamber in high purity hydrogen at room temperature for 30 min. Then the sample was directly moved to the analysis chamber without being exposed to the environment.

**Nuclear magnetic resonance (NMR)** spectra of  $^{31}P$ ,  $^1H$  and  $^{13}C$  were recorded on a Bruker Advance 600 MHz spectrometer. The chemical shift of  $^{31}P$  spectrum uses 85%  $H_3PO_4$  ( $\delta = 0$ ) as the internal standard, and chemical shifts were reported in parts per million (ppm,  $\delta$ ).

**Cyclic voltammograms (CV)** was recorded on an electrochemical workstation (Shanghai Chenhua Instrument Co. Ltd) at room temperature based on a three electrodes system.

### 1.2 Synthesis

#### Synthesis of $K_5Na_4[P_2W_{15}(TaO_2)_3O_{59}] \cdot 17H_2O$

$K_5Na_4[P_2W_{15}(TaO_2)_3O_{59}] \cdot 17H_2O$  was synthesized according to our previous report,<sup>1</sup> but with some modifications.  $K_8[Ta_6O_{19}] \cdot 17H_2O^2$  (11 g, 5.5 mmol) was dissolved in an  $H_2O_2$  solution (60 mL of 30% aqueous  $H_2O_2$  in 800 mL of deionized water) at room temperature. HCl (75 mL, aq. 1.0 M) was added with vigorous stirring in a single addition, followed by the immediate addition of  $Na_{12}[\alpha-P_2W_{15}O_{56}] \cdot 18H_2O^3$  (47.5 g, 0.011 mol, dried and ground to a fine powder before use). The resulting mixture was stirred for 30 min at room temperature and then KCl (35 g) was added. The mixture was stirred for 40 min and filtered to remove a small amount of white precipitate. Solid KCl (125 g) was added to the resulting yellow filtrate and stirred for another 40 min. The resulting yellow precipitate was collected by filtration, washed three times with ethanol (20 mL), and dried in air to give the product as a yellow powder (32 g, 55% yield based on Ta precursor).  $^{31}P$  NMR ( $D_2O$ )  $\delta = -10.5$  (s),  $-14.5$  (s) (referenced externally to 85%  $H_3PO_4$ ).

## Synthesis of $\text{Na}_2\text{H}_{38}[\text{P}_8\text{W}_{60}\text{Ta}_{12}\text{O}_{242}(\text{C}_2\text{O}_4)_4] \cdot 56\text{H}_2\text{O}$ ( $\text{C}_2\text{O}_4\text{-POM}$ )

A sample of  $\text{K}_5\text{Na}_4[\text{P}_2\text{W}_{15}(\text{TaO}_2)_3\text{O}_{59}] \cdot 17\text{H}_2\text{O}$  (0.20 g, 0.04 mmol) was dissolved in 20 mL of deionized water at 80 °C. Solid  $\text{NaHSO}_3$  (0.04 g, 0.38 mmol) was added with stirring until the yellow solution became colorless. Then, solid  $(\text{NH}_4)_2\text{C}_2\text{O}_4$  (0.12 g, 0.84 mmol) was added. The pH of the resulting solution was adjusted to 3.0 with hydrochloric acid (1 M), and further stirred at 80 °C for 40 min. After cooled to room temperature the reaction solution was filtrated and left for evaporation. Light yellow cuboid crystal products were obtained after about one week. Yield: 0.13 g (65% based on  $\text{K}_5\text{Na}_4[\text{P}_2\text{W}_{15}(\text{TaO}_2)_3\text{O}_{59}] \cdot 17\text{H}_2\text{O}$ ). Anal. Calcd. (%): C 0.51, Na 0.24, P 1.31, Ta 11.52, W 58.78; found C 0.58, Na 0.38, P 0.88, Ta 11.51, W 59.33. IR (KBr disks,  $\text{cm}^{-1}$ ): 1608 (vw), 1405 (vw), 1078 (vw), 1012 (vw), 945 (s), 893 (s).  $^{31}\text{P}$  NMR ( $\text{D}_2\text{O}$ )  $\delta = -11.5$  -13.6 ppm.  $^{13}\text{C}\{^1\text{H}\}$  NMR ( $\text{D}_2\text{O}$ )  $\delta = -165.42$  ppm.

## Synthesis of composite $\text{Pd}/(\text{C}_2\text{O}_4\text{-POM})@\text{rGO}$

$\text{Pd}/(\text{C}_2\text{O}_4\text{-POM})@\text{rGO}$  was synthesized according to the published method<sup>4</sup>. 4 mL 10 mg/mL of GO dispersion was dispersed in 400 mL of high purity water and ultrasonic peel for 3 h. Adjust the pH of the solution to 2.5 using 1M  $\text{H}_2\text{C}_2\text{O}_4$  solution, then 1 mL 1.2 g/mL  $\text{C}_2\text{O}_4\text{-POM}$  was added. The mixture was stirred for 30 minutes. 4 mL 10 mM  $\text{PdCl}_2$  solution was added to the mixture and stirred for another 20 minutes. 30 mL ethanol was added and the resulting mixture was transferred to the photoreactor, flushed with nitrogen, and irradiated with a 175 W mercury lamp for 1h. The resulting black suspension was filtered and then washed with deionized water and ethanol three times to obtain the composite  $\text{Pd}/(\text{C}_2\text{O}_4\text{-POM})@\text{rGO}$  (46.20 mg). The black solid material was dried in a vacuum drying oven at 100 °C for 2 h. The Pd loading amount in the composite (for GO support) was 10.64 wt% as determined by ICP-AES, the  $\text{C}_2\text{O}_4\text{-POM}$  loading amount in the composite (for GO support) was 13.50 wt% as determined by ICP-AES.

## Synthesis of composite of $\text{Pd}@\text{rGO}$

$\text{Pd}@\text{rGO}$  was synthesized according to the reported photoreduction method<sup>5</sup>. 4 mL 10 mg/mL of GO dispersion was dispersed in 400 mL of high purity water and ultrasonic peel for 3 h. Then 2 mL of 10 mM  $\text{PdCl}_2$  solution was added. The resulting mixture was stirred for 30 minutes and then transferred to the photoreactor. The photoreactor was flushed with nitrogen and irradiated with a 175 W mercury lamp for 1 h. The black suspension was filtered and washed with deionized water and ethanol three times to obtain the composite  $\text{Pd}@\text{rGO}$ . The black solid was dried in a vacuum drying oven at 100 °C for 2 h. The Pd loading amount in the composite (for GO support) was 12.56 wt% as determined by ICP-AES.

## S2 X-ray crystallography

Single crystal XRD analysis of  $\text{C}_2\text{O}_4\text{-POM}$  was recorded on an Agilent SuperNova Dual diffractometer using graphite-monochromated Mo  $K\alpha$  radiation,  $\lambda = 0.71073$  Å. The linear absorption coefficients, scattering factors for the atoms, and anomalous dispersion corrections were taken from the International Tables for X-Ray Crystallography. Empirical absorption corrections were applied. Structures were solved using direct methods (SHELXT)<sup>6</sup> and refined by full-matrix least-squares (SHELXL) interfaced with the program OLEX2.<sup>7</sup> Anisotropic thermal parameters were used to refine all non-hydrogen atoms, with the exception for a few oxygen atoms. Those hydrogen atoms attached to lattice water molecules were not located. Crystallization water molecules were estimated by thermogravimetry and only partial of them were achieved with the X-ray structure analysis. The crystal data and structure refinement results are summarized in Table S1. Further details on the crystal structure investigations can be obtained free of charge from The Cambridge Crystallographic Data Centre via <https://www.ccdc.cam.ac.uk/structures/> by quoting the depository numbers CCDC-2321884 ( $\text{C}_2\text{O}_4\text{-POM}$ ).

**Table S1.** Crystal data and structural refinements.<sup>[a]</sup>

| Compound                                             | <b>C<sub>2</sub>O<sub>4</sub>-POM</b>                                                           |
|------------------------------------------------------|-------------------------------------------------------------------------------------------------|
| Formula                                              | C <sub>8</sub> Na <sub>2</sub> O <sub>283</sub> P <sub>8</sub> Ta <sub>12</sub> W <sub>60</sub> |
| Formula weight (g·mol <sup>-1</sup> )                | 18120.22                                                                                        |
| <i>T</i> (K)                                         | 150(10)                                                                                         |
| Wavelength (Å)                                       | 1.54184                                                                                         |
| Crystal                                              | monoclinic                                                                                      |
| Space group                                          | P2 <sub>1</sub> /n                                                                              |
| <i>a</i> (Å)                                         | 37.0584(4)                                                                                      |
| <i>b</i> (Å)                                         | 24.8913(3)                                                                                      |
| <i>c</i> (Å)                                         | 37.1568(4)                                                                                      |
| $\alpha$ (°)                                         | 90                                                                                              |
| $\beta$ (°)                                          | 93.1020(10)                                                                                     |
| $\gamma$ (°)                                         | 90                                                                                              |
| <i>V</i> (Å <sup>3</sup> )                           | 34224.4(7)                                                                                      |
| <i>Z</i>                                             | 4                                                                                               |
| <i>D</i> <sub>calc</sub> (mg m <sup>-3</sup> )       | 3.517                                                                                           |
| $\mu$ (mm <sup>-1</sup> )                            | 24.020                                                                                          |
| <i>F</i> (000)                                       | 31080.0                                                                                         |
| Crystal size (mm <sup>3</sup> )                      | 0.15 × 0.09 × 0.09                                                                              |
| Goodness-of-fit on <i>F</i> <sup>2</sup>             | 0.981                                                                                           |
| Final <i>R</i> indices                               | <i>R</i> <sub>1</sub> = 0.0850                                                                  |
| [ <i>I</i> > 2 $\sigma$ ( <i>I</i> )] <sup>[a]</sup> | w <i>R</i> <sub>2</sub> = 0.2057                                                                |
| <i>R</i> indices <sup>[a]</sup>                      | <i>R</i> <sub>1</sub> = 0.1431                                                                  |
| (all data)                                           | w <i>R</i> <sub>2</sub> = 0.2341                                                                |

<sup>[a]</sup>  $R_1 = \sum ||F_o| - |F_c|| / \sum |F_o|$ ;  $wR_2 = \{ \sum [w(F_o^2 - F_c^2)^2] / \sum [w(F_o^2)^2] \}^{1/2}$

### S3 Structural representations

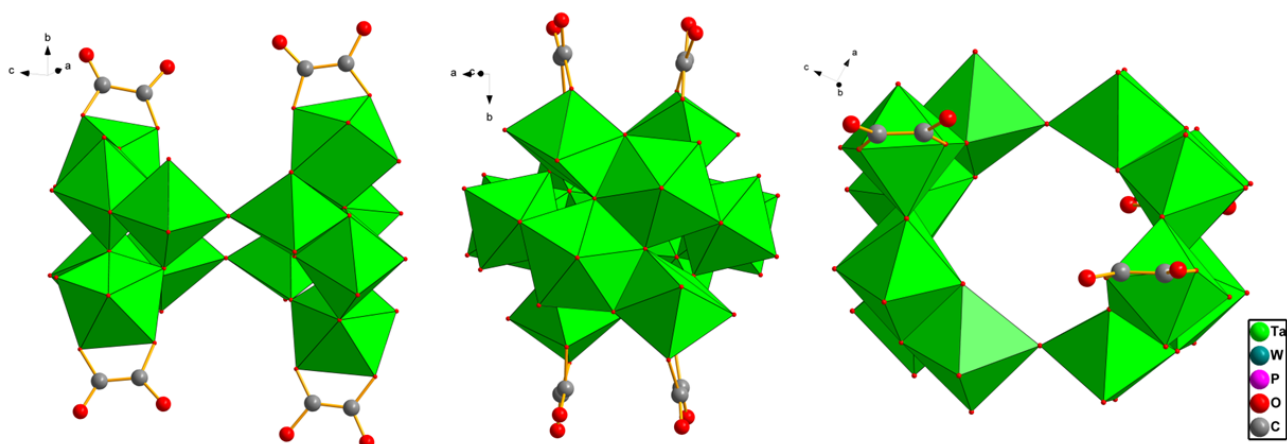

**Figure S1.** Mixed polyhedral/ball-and-stick representations of the central  $\{Ta_{12}O_{42} (HC_2O_4)\}$  cluster in  $C_2O_4$ -POM.

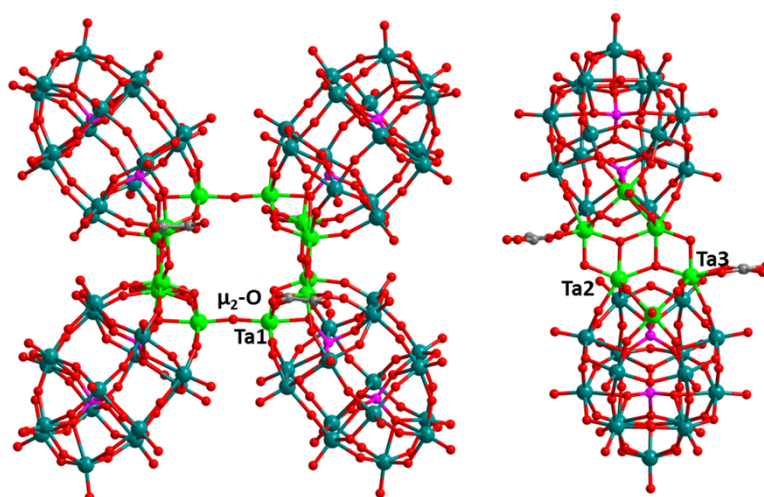

**Figure S2.** Ball-and-stick representation of  $C_2O_4$ -POM, highlighting the coordination environment of Ta1 and the  $\mu_2$ -O (left) and a half of  $C_2O_4$ -POM highlighting the coordination of Ta2 and Ta3 (right).

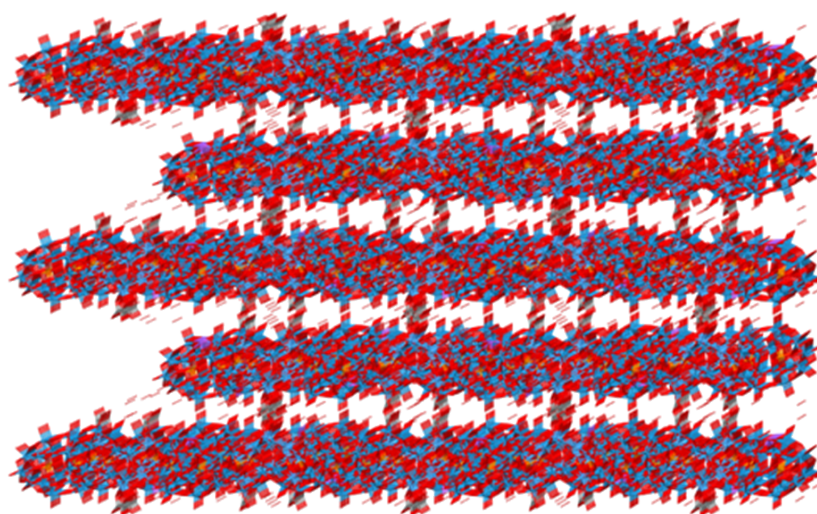

**Figure S3.** Ball-and-stick representation of 2D layer for  $C_2O_4$ -POM.

### S4 Bond valence calculations of the C<sub>2</sub>O<sub>4</sub>-POM.

**Table S2.** Bond valence calculations of select O atoms of the C<sub>2</sub>O<sub>4</sub>-POM.

| Atom | Bond     | Distance/Å | Bond Valence | Bond Valence Sum (BVS) |
|------|----------|------------|--------------|------------------------|
| O1   | O1-Ta3   | 1.935      | 0.960        | 2.178                  |
|      | O1-Ta4   | 1.847      | 1.218        |                        |
| O2   | O2-Ta11  | 1.870      | 1.145        | 2.183                  |
|      | O2-Ta8   | 1.906      | 1.039        |                        |
| O3   | O3-Ta7   | 1.895      | 1.070        | 1.839                  |
|      | O3-Ta8   | 2.017      | 0.769        |                        |
| O5   | O5-Ta5   | 1.952      | 0.917        | 1.839                  |
|      | O5-Ta7   | 1.952      | 0.917        |                        |
| O6   | O6-Ta5   | 1.994      | 0.819        | 2.212                  |
|      | O6-Ta6   | 2.064      | 0.678        |                        |
|      | O6-Ta7   | 2.044      | 0.715        |                        |
| O7   | O7-Ta6   | 2.026      | 0.751        | 2.235                  |
|      | O7-Ta7   | 2.100      | 0.615        |                        |
|      | O7-Ta9   | 1.972      | 0.869        |                        |
| O8   | O8-Ta4   | 1.921      | 0.997        | 1.905                  |
|      | O8-Ta5   | 1.956      | 0.907        |                        |
| O9   | O9-Ta4   | 1.936      | 0.958        | 2.010                  |
|      | O9-Ta6   | 1.901      | 1.053        |                        |
| O11  | O11-Ta6  | 1.931      | 0.971        | 1.734                  |
|      | O11-Ta9  | 2.020      | 0.763        |                        |
| O17  | O17-C6   | 1.331      | 1.205        | 1.766                  |
|      | O17-Ta5  | 2.134      | 0.561        |                        |
| O18  | O18-C5   | 1.350      | 1.145        | 1.709                  |
|      | O18-Ta5  | 2.132      | 0.564        |                        |
| O19  | O19-C6   | 1.278      | 1.391        | 1.391                  |
| O20  | O20-C5   | 1.251      | 1.495        | 1.495                  |
| O21  | O21-Ta2  | 1.966      | 0.883        | 1.810                  |
|      | O21-Ta12 | 1.948      | 0.927        |                        |
| O22  | O22-Ta2  | 2.044      | 0.715        | 2.217                  |
|      | O22-Ta10 | 2.096      | 0.621        |                        |
|      | O22-Ta12 | 1.967      | 0.881        |                        |
| O23  | O23-Ta1  | 1.892      | 1.079        | 1.871                  |
|      | O23-Ta10 | 2.006      | 0.793        |                        |
| O24  | O24-Ta1  | 2.024      | 0.755        | 2.212                  |
|      | O24-Ta2  | 2.071      | 0.665        |                        |
|      | O24-Ta10 | 2.006      | 0.793        |                        |
| O25  | O25-Ta10 | 1.918      | 1.005        | 1.844                  |
|      | O25-Ta11 | 1.985      | 0.839        |                        |
| O26  | O26-Ta2  | 1.915      | 1.014        | 1.869                  |
|      | O26-Ta3  | 1.978      | 0.855        |                        |
| O27  | O27-Ta1  | 2.117      | 0.587        | 1.571                  |
|      | O27-C3   | 1.406      | 0.984        |                        |
| O28  | O28-Ta1  | 2.158      | 0.526        | 1.734                  |
|      | O28-C4   | 1.330      | 1.208        |                        |
| O29  | O29-C4   | 1.328      | 1.215        | 1.215                  |
| O59  | O59-C1   | 1.181      | 1.807        | 1.807                  |
| O89  | O89-C3   | 1.235      | 1.562        | 1.562                  |
| O90  | O90-Ta12 | 2.163      | 0.519        | 1.861                  |
|      | O90-C7   | 1.291      | 1.343        |                        |
| O91  | O91-Ta12 | 2.227      | 0.436        | 1.698                  |
|      | O91-C8   | 1.314      | 1.262        |                        |
| O07X | O07X-Ta9 | 2.190      | 0.482        | 1.596                  |
|      | O07X-C1  | 1.360      | 1.114        |                        |
| O06B | O06B-Ta9 | 2.130      | 0.567        | 1.730                  |
|      | O06B-C2  | 1.344      | 1.163        |                        |
| O92  | O92-C8   | 1.272      | 1.413        | 1.413                  |
| O94  | O94-C7   | 1.362      | 1.108        | 1.108                  |
| O96  | O96-Ta3  | 1.866      | 1.157        | 1.963                  |
|      | O96-Ta1  | 2.000      | 0.806        |                        |
| O108 | O108-C2  | 1.241      | 1.537        | 1.537                  |

**Table S3.** Bond valence calculations of Ta atoms of the **C<sub>2</sub>O<sub>4</sub>-POM**.

| Atom | Bond     | Distance/Å | Bond Valence | Bond Valence Sum (BVS) |
|------|----------|------------|--------------|------------------------|
| Ta1  | Ta1-O23  | 1.892      | 1.079        | 5.258                  |
|      | Ta1-O24  | 2.024      | 0.755        |                        |
|      | Ta1-O27  | 2.117      | 0.587        |                        |
|      | Ta1-O28  | 2.158      | 0.526        |                        |
|      | Ta1-O47  | 2.031      | 0.741        |                        |
|      | Ta1-O48  | 2.019      | 0.765        |                        |
|      | Ta1-O96  | 2.000      | 0.806        |                        |
| Ta2  | Ta2-O21  | 1.966      | 0.883        | 5.233                  |
|      | Ta2-O22  | 2.044      | 0.715        |                        |
|      | Ta2-O24  | 2.071      | 0.665        |                        |
|      | Ta2-O26  | 1.915      | 1.014        |                        |
|      | Ta2-O45  | 2.021      | 0.761        |                        |
|      | Ta2-O46  | 1.947      | 0.930        |                        |
|      | Ta2-O97  | 2.411      | 0.265        |                        |
| Ta3  | Ta3-O1   | 1.935      | 0.960        | 5.129                  |
|      | Ta3-O26  | 1.978      | 0.855        |                        |
|      | Ta3-O43  | 2.022      | 0.759        |                        |
|      | Ta3-O44  | 1.986      | 0.837        |                        |
|      | Ta3-O96  | 1.866      | 1.157        |                        |
|      | Ta3-O97  | 2.134      | 0.561        |                        |
| Ta4  | Ta4-O1   | 1.847      | 1.218        | 5.204                  |
|      | Ta4-O8   | 1.921      | 0.997        |                        |
|      | Ta4-O9   | 1.936      | 0.958        |                        |
|      | Ta4-O15  | 2.051      | 0.702        |                        |
|      | Ta4-O16  | 2.014      | 0.776        |                        |
|      | Ta4-O103 | 2.139      | 0.553        |                        |
| Ta5  | Ta5-O5   | 1.952      | 0.917        | 5.185                  |
|      | Ta5-O6   | 1.994      | 0.819        |                        |
|      | Ta5-O8   | 1.956      | 0.907        |                        |
|      | Ta5-O10  | 2.067      | 0.672        |                        |
|      | Ta5-O14  | 2.029      | 0.745        |                        |
|      | Ta5-O17  | 2.134      | 0.561        |                        |
|      | Ta5-O18  | 2.132      | 0.564        |                        |
| Ta6  | Ta6-O6   | 2.064      | 0.678        | 5.169                  |
|      | Ta6-O7   | 2.026      | 0.751        |                        |
|      | Ta6-O9   | 1.901      | 1.053        |                        |
|      | Ta6-O11  | 1.931      | 0.971        |                        |
|      | Ta6-O12  | 1.980      | 0.850        |                        |
|      | Ta6-O13  | 2.089      | 0.633        |                        |
|      | Ta6-O103 | 2.459      | 0.233        |                        |
| Ta7  | Ta7-O3   | 1.895      | 1.070        | 5.258                  |
|      | Ta7-O5   | 1.952      | 0.917        |                        |
|      | Ta7-O6   | 2.044      | 0.715        |                        |
|      | Ta7-O7   | 2.100      | 0.615        |                        |
|      | Ta7-O38  | 1.955      | 0.910        |                        |
|      | Ta7-O39  | 2.004      | 0.797        |                        |
|      | Ta7-O53  | 2.457      | 0.234        |                        |
| Ta8  | Ta8-O2   | 1.906      | 1.039        | 4.960                  |
|      | Ta8-O3   | 2.017      | 0.769        |                        |
|      | Ta8-O4   | 1.914      | 1.016        |                        |
|      | Ta8-O40  | 2.018      | 0.767        |                        |
|      | Ta8-O41  | 1.993      | 0.821        |                        |
|      | Ta8-O53  | 2.143      | 0.547        |                        |
|      | Ta8-O96  | 2.000      | 0.806        |                        |
| Ta9  | Ta9-O4   | 1.946      | 0.932        | 5.182                  |
|      | Ta9-O7   | 1.972      | 0.869        |                        |
|      | Ta9-O11  | 2.020      | 0.763        |                        |
|      | Ta9-O36  | 2.004      | 0.797        |                        |
|      | Ta9-O37  | 2.016      | 0.771        |                        |
|      | Ta9-O06B | 2.130      | 0.567        |                        |
|      | Ta9-O07X | 2.190      | 0.482        |                        |
| Ta10 | Ta10-O22 | 2.096      | 0.621        |                        |
|      | Ta10-O23 | 2.006      | 0.793        |                        |

|      |           |       |       |       |
|------|-----------|-------|-------|-------|
| Ta10 | Ta10-O24  | 2.006 | 0.793 | 5.193 |
|      | Ta10-O25  | 1.918 | 1.005 |       |
|      | Ta10-O31  | 1.909 | 1.030 |       |
|      | Ta10-O32  | 2.041 | 0.721 |       |
|      | Ta10-O105 | 2.465 | 0.229 |       |
| Ta11 | Ta11-O2   | 1.870 | 1.145 | 5.530 |
|      | Ta11-O25  | 1.985 | 0.839 |       |
|      | Ta11-O30  | 1.899 | 1.058 |       |
|      | Ta11-O33  | 2.005 | 0.795 |       |
|      | Ta11-O49  | 1.869 | 1.148 |       |
|      | Ta11-O105 | 2.144 | 0.546 |       |
| Ta12 | Ta12-O21  | 1.948 | 0.927 | 5.367 |
|      | Ta12-O22  | 1.967 | 0.881 |       |
|      | Ta12-O34  | 1.980 | 0.850 |       |
|      | Ta12-O35  | 1.974 | 0.864 |       |
|      | Ta12-O49  | 1.963 | 0.890 |       |
|      | Ta12-O90  | 2.163 | 0.519 |       |
|      | Ta12-O91  | 2.227 | 0.436 |       |

### S5 Characterization of the C<sub>2</sub>O<sub>4</sub>-POM

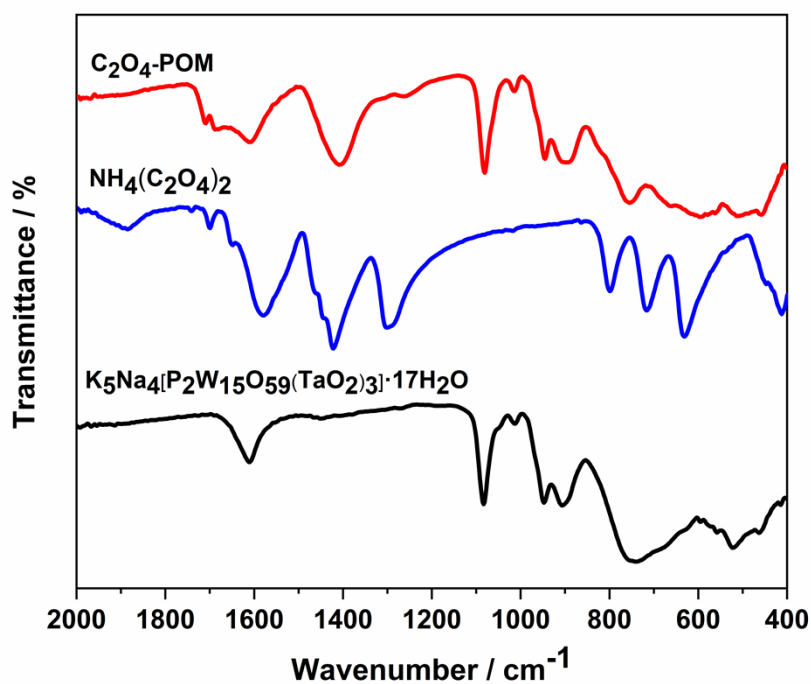

Figure S4. IR spectra of C<sub>2</sub>O<sub>4</sub>-POM.

The strong signal peak of C<sub>2</sub>O<sub>4</sub>-POM at 1611 cm<sup>-1</sup> can refer to the stretching vibration of lattice water and coordination water molecules. The characteristic signal peaks of C<sub>2</sub>O<sub>4</sub>-POM at 1085 cm<sup>-1</sup>, 1026 cm<sup>-1</sup>, 951 cm<sup>-1</sup>, 901 cm<sup>-1</sup> and 760 cm<sup>-1</sup>. It can be attributed to the stretching vibration of Vas(P-O<sub>a</sub>), Vas(W-O<sub>t</sub>), Vas(W-O<sub>b</sub>-W), Vas(W-O<sub>c</sub>-W) in Dawson type anions. 1405 cm<sup>-1</sup> and 1608 cm<sup>-1</sup> are attributed to symmetric and antisymmetric stretching vibrations of C=O, respectively.



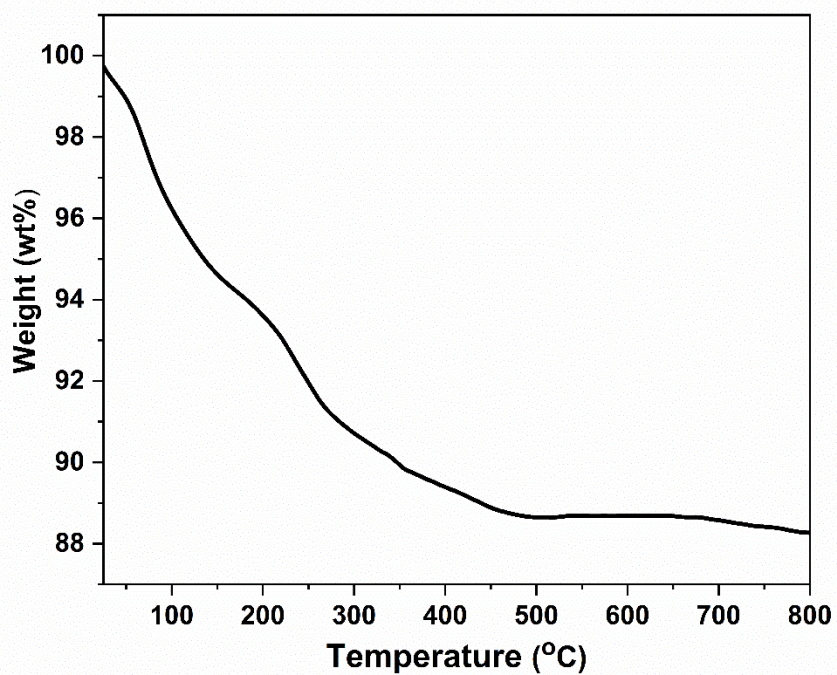

**Figure S5.** The TGA curves of C<sub>2</sub>O<sub>4</sub>-POM measured in N<sub>2</sub> from 25 °C to 800 °C.

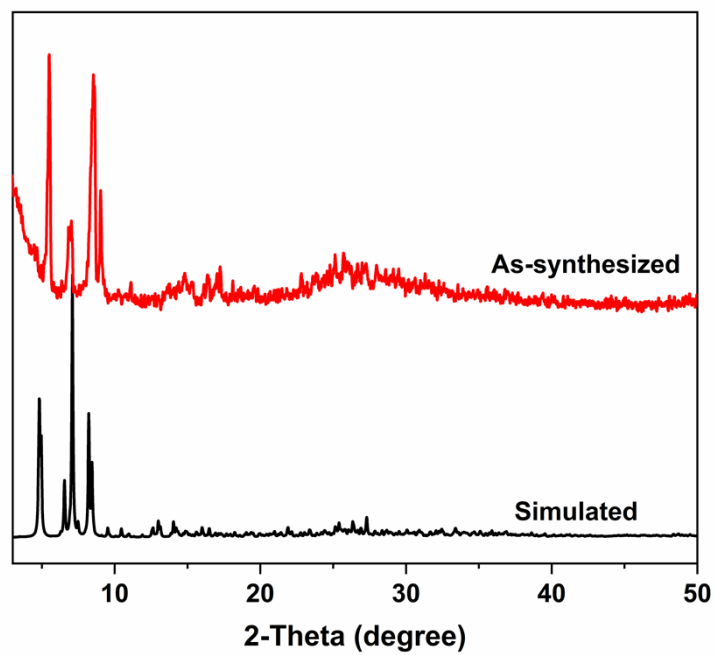

**Figure S6.** Simulated (black) and as-synthesized (red) PXRD patterns of C<sub>2</sub>O<sub>4</sub>-POM.

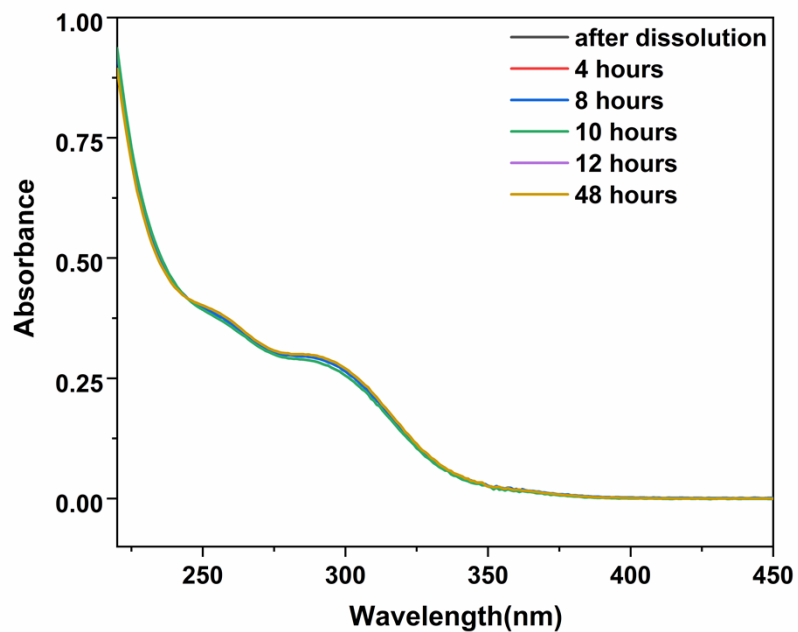

Figure S7. UV-vis absorption spectra of  $C_2O_4$ -POM in acidic solution (pH = 2.5).

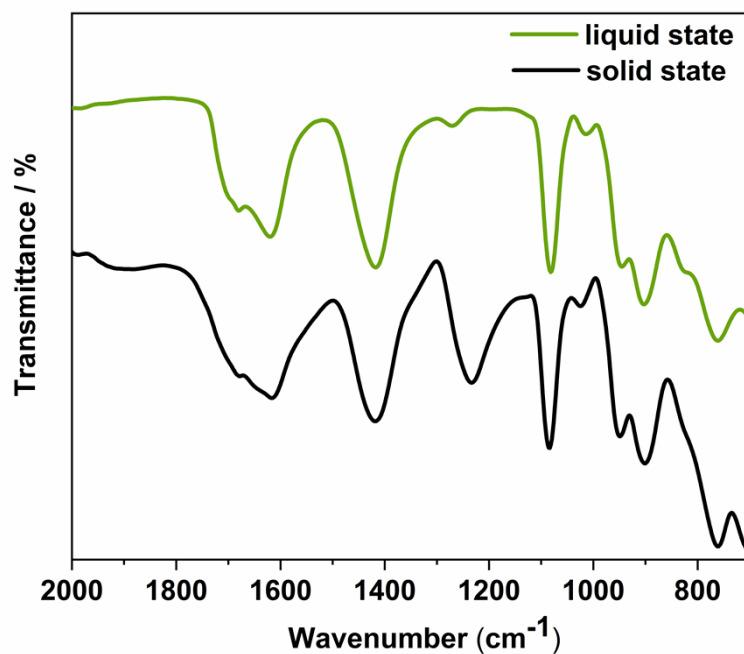

Figure S8. IR spectra of  $C_2O_4$ -POM in acidic solution (pH = 2.5) and solid state.

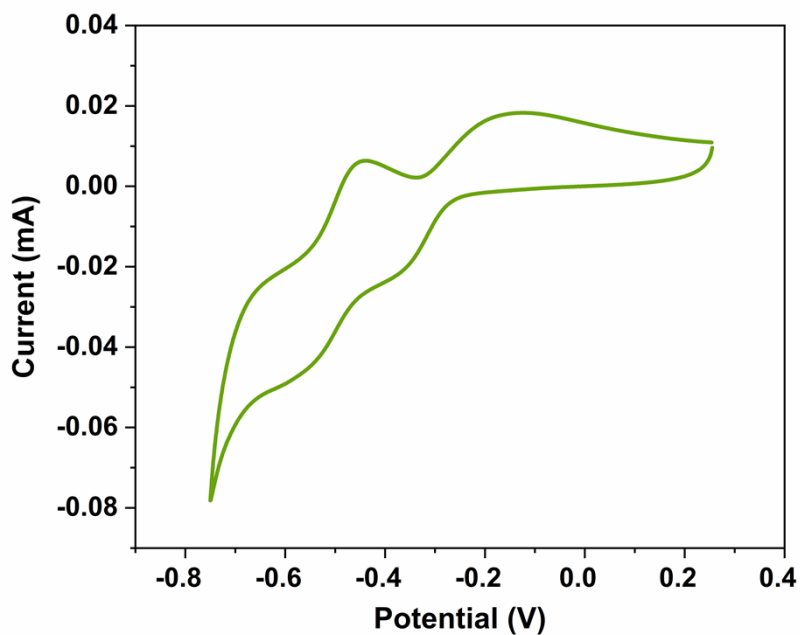

**Figure S9.** Cyclic voltammogram of  $C_2O_4$ -POM in 0.1 M HCl (1.65 mM) at  $10 \text{ mVs}^{-1}$ . The working electrode was glassy carbon, counter electrode was platinum filament, and the reference electrode was Ag/AgCl.

### S6 Characterization of Pd/( $C_2O_4$ -POM)@rGO

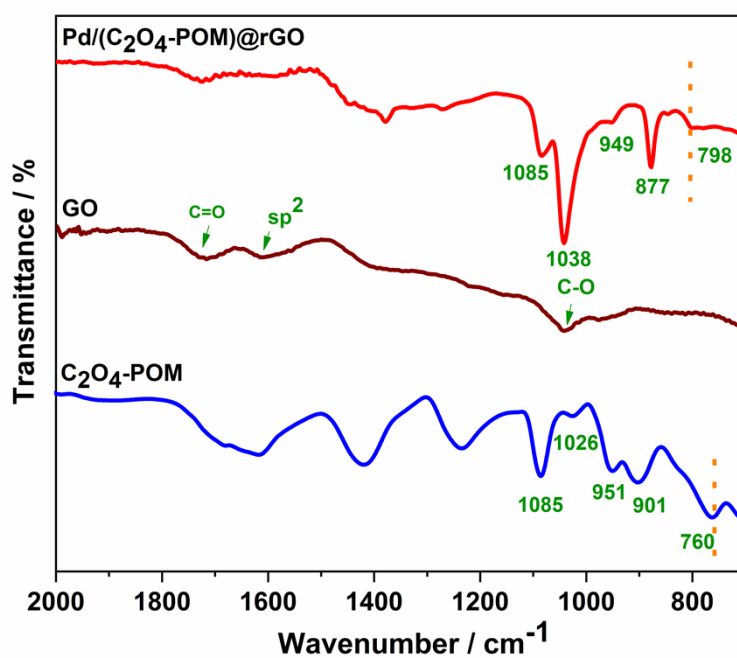

**Figure S10.** IR spectra of Pd/( $C_2O_4$ -POM)@rGO.

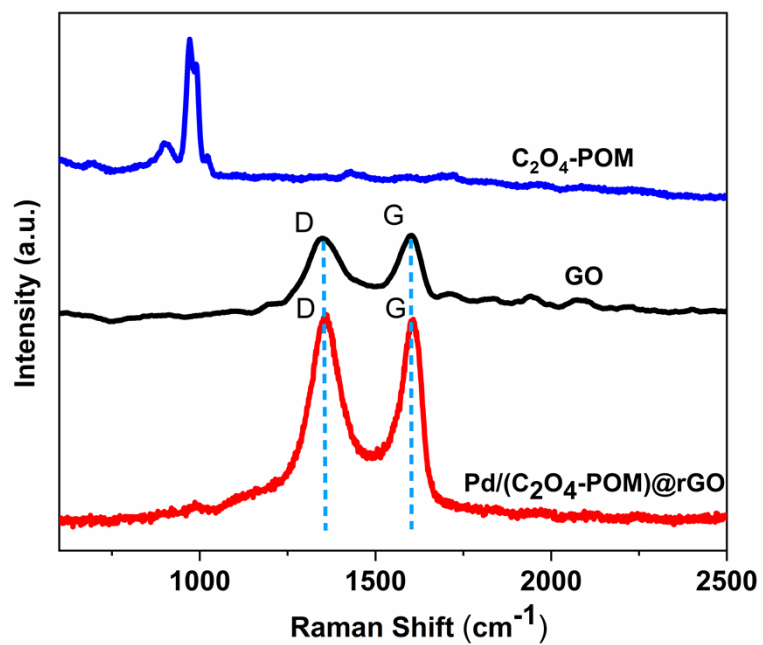

Figure S11. Raman spectra of GO and Pd/(C<sub>2</sub>O<sub>4</sub>-POM)@rGO.

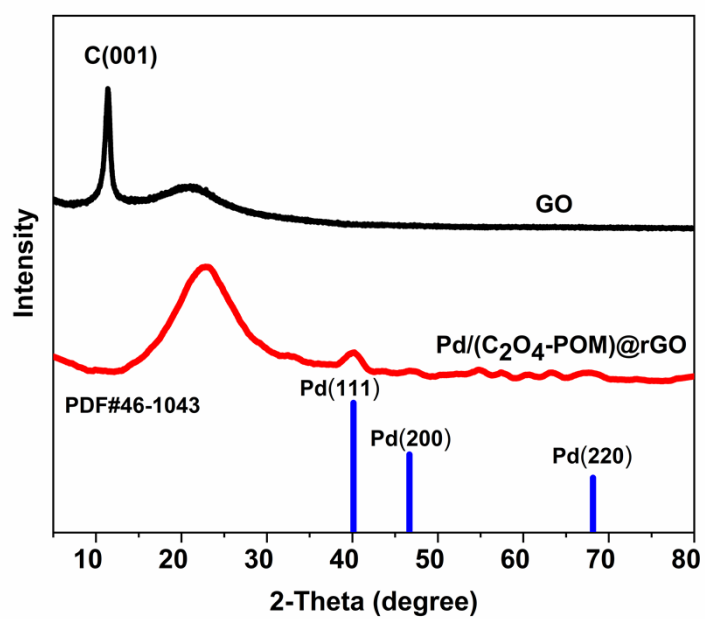

Figure S12. XRD spectra of GO, Pd/(C<sub>2</sub>O<sub>4</sub>-POM)@rGO and Pd NPs.

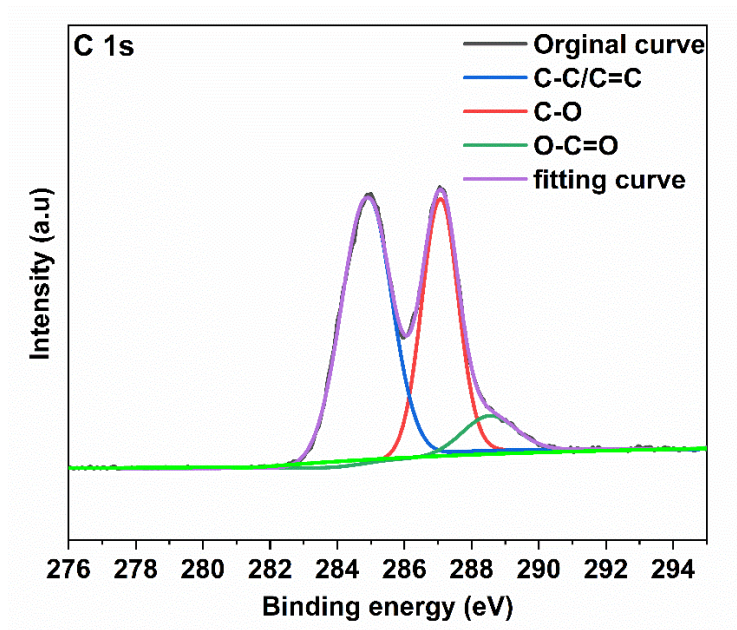

Figure S13. XPS spectra of C 1s of GO.

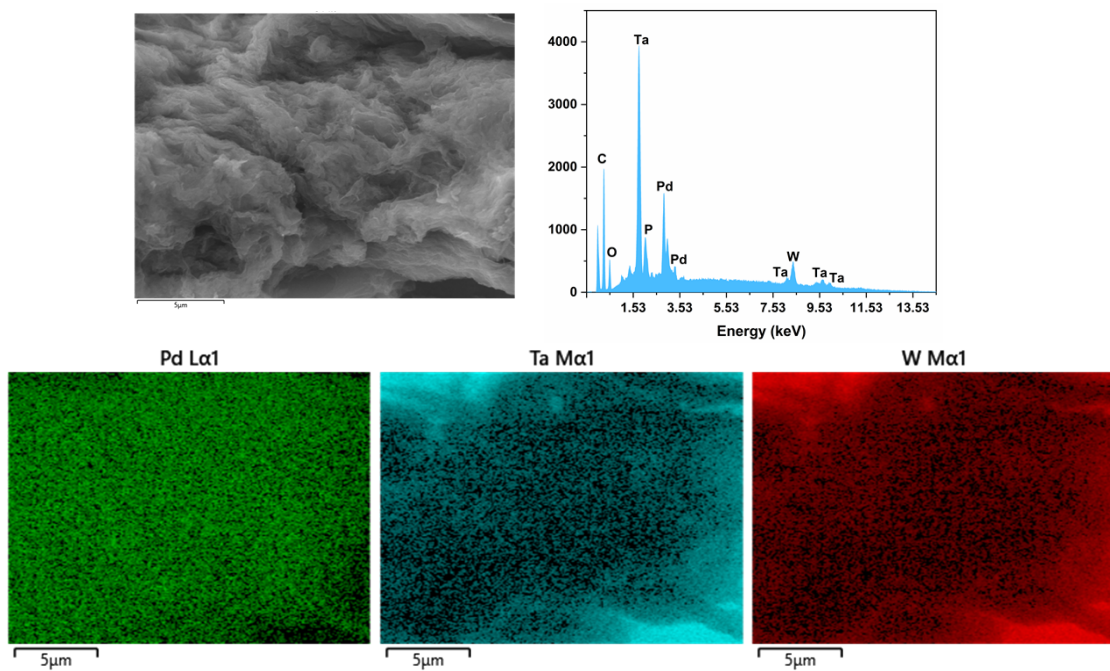

Figure S14. SEM-EDX spectra and the elemental mapping of Pd, W and Ta for Pd/(C<sub>2</sub>O<sub>4</sub>-POM)@rGO.

**Table S4.** Binding energy and percentage of various components for **Pd/(C<sub>2</sub>O<sub>4</sub>-POM)@rGO** before and after exposure to H<sub>2</sub> as determined by XPS analysis.

| Sample                         | Binding Energy/eV | Relative Content [%] |
|--------------------------------|-------------------|----------------------|
| before H <sub>2</sub> exposure |                   |                      |
| W <sup>6+</sup>                | 36.2              | 100                  |
|                                | 38.3              |                      |
| after H <sub>2</sub> exposure  |                   |                      |
| W <sup>5+</sup>                | 34.7              | 73.2                 |
|                                | 36.8              |                      |
| W <sup>δ+</sup>                | 33.8              | 26.8                 |
|                                | 31.8              |                      |
| before H <sub>2</sub> exposure |                   |                      |
| Pd <sup>0</sup>                | 335.3             | 44.9                 |
|                                | 340.6             |                      |
| Pd <sup>2+</sup>               | 337.2             | 55.1                 |
|                                | 342.4             |                      |
| after H <sub>2</sub> exposure  |                   |                      |
| Pd <sup>0</sup>                | 335.7             | 100                  |
|                                | 340.9             |                      |
| before H <sub>2</sub> exposure |                   |                      |
| -OH                            | 532.2             | 43.0                 |
| -OH <sub>2</sub>               | 535.2             | 5.18                 |
| O <sub>latt</sub>              | 531.1             | 51.8                 |
| after H <sub>2</sub> exposure  |                   |                      |
| -OH                            | 531.6             | 87.7                 |
| -OH <sub>2</sub>               | 535.8             | 5.76                 |
| O <sub>latt</sub>              | 529.8             | 6.6                  |

<sup>a</sup> Estimated based on the area of each pair of peaks

## S7 Catalytic Hydrogenation of Olefins

**Hydrogenation of Olefins** : Catalysts were introduced in a reaction tube with a stirrer bar and sealed with a silicone septum. After replacing the air with Hydrogen, the substrate (0.2 mmol) and solvent (2 mL) were introduced in the tube. The reaction was performed at room temperature (r.t.) under H<sub>2</sub> (1 bar). Yields were determined by GC-MS. Solid reaction products were recovered by centrifugation and filtering to remove the catalyst, followed by rotary evaporation to remove the solvent.

**Table S5.** Optimization of the conditions for hydrogenation of olefins <sup>a</sup>.

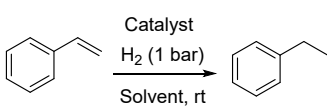

| Entry | Catalyst                                       | Solvent         | Time (min) | Yield (%) |
|-------|------------------------------------------------|-----------------|------------|-----------|
| 1     | <b>Pd/(C<sub>2</sub>O<sub>4</sub>-POM)@rGO</b> | Ethanol         | 40         | 84        |
| 2     | <b>Pd/(C<sub>2</sub>O<sub>4</sub>-POM)@rGO</b> | Acetone         | 40         | 63        |
| 3     | <b>Pd/(C<sub>2</sub>O<sub>4</sub>-POM)@rGO</b> | Toluene         | 40         | 28        |
| 4     | <b>Pd/(C<sub>2</sub>O<sub>4</sub>-POM)@rGO</b> | Tetrahydrofuran | 40         | 80        |
| 5     | <b>Pd/(C<sub>2</sub>O<sub>4</sub>-POM)@rGO</b> | Acetonitrile    | 40         | 99        |

<sup>a</sup>Reaction condition: 0.2 mmol substrates, room temperature, 2 mL solvent, and 1 atm H<sub>2</sub> for 40 min, 4.8 mg **Pd/(C<sub>2</sub>O<sub>4</sub>-POM)@rGO** catalyst (5 μmol Pd), Yields Were determined by GC-MS.

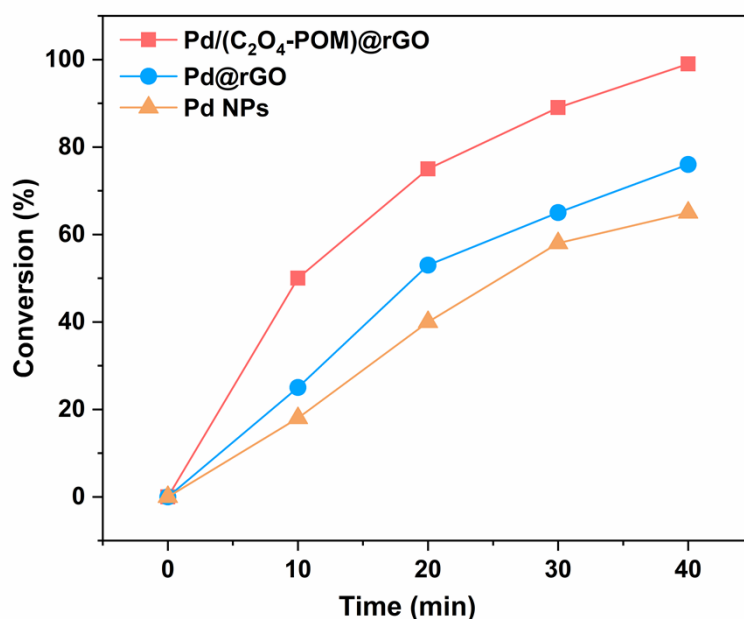

**Figure S15.** Comparison of the catalytic activity and Styrene hydrogenation conversion over time for **Pd/(C<sub>2</sub>O<sub>4</sub>-POM)@rGO**, **Pd@rGO**, **Pd NPs**. Reaction conditions: 0.2 mmol styrene, room temperature, 2 mL CH<sub>3</sub>CN, and 1 atm H<sub>2</sub> for 40 min. Catalyst: 4.8 mg **Pd/(C<sub>2</sub>O<sub>4</sub>-POM)@rGO** Catalyst (5 μmol Pd), 4.2 mg **Pd@rGO** Catalyst (5 μmol Pd), 0.53 mg **Pd NPs** Catalyst (5 μmol Pd).

**Table S6** Catalytic reaction of olefins derivatives by Pd/(C<sub>2</sub>O<sub>4</sub>-POM)@rGO.

| Entry | Substrate                                                                           | Product                                                                              | Yield(%) |
|-------|-------------------------------------------------------------------------------------|--------------------------------------------------------------------------------------|----------|
| 1     | 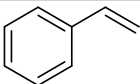   |    | >99%     |
| 2     |    |    | >99%     |
| 3     |    |    | >99%     |
| 4     |    |    | >99%     |
| 5     |    |    | >99%     |
| 6     |    |    | >99%     |
| 7     |   |   | >99%     |
| 8     |  |  | >99%     |
| 9     |  |  | >99%     |
| 10    |  |  | >99%     |
| 11    |  |  | >99%     |
| 12    |  |  | >99%     |
| 13    |  |  | >99%     |

Reaction condition: 4.8 mg Pd/(C<sub>2</sub>O<sub>4</sub>-POM)@rGO Catalyst (5 μmol Pd), 0.2 mmol substrates, room temperature, 2 mL of CH<sub>3</sub>CN solvent, and 1 atm H<sub>2</sub> for 1 h.



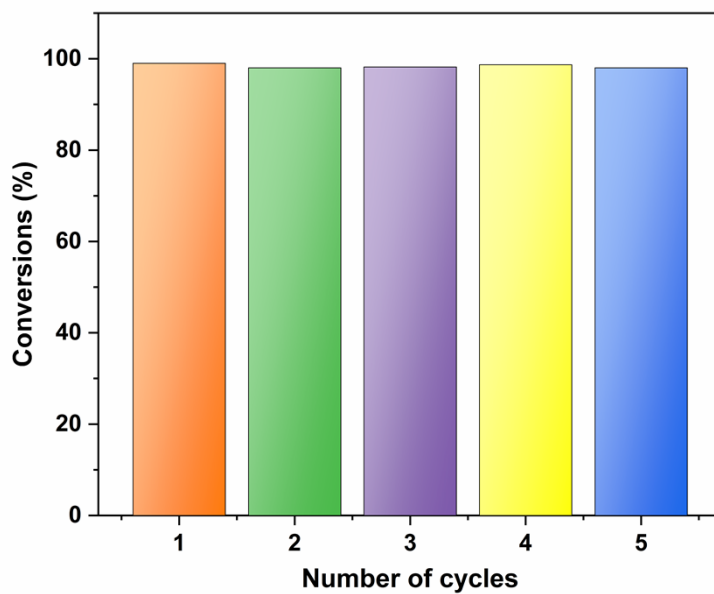

Figure S16. Recyclability of  $\text{Pd}/(\text{C}_2\text{O}_4\text{-POM})@\text{rGO}$  for the hydrogenation of olefins.

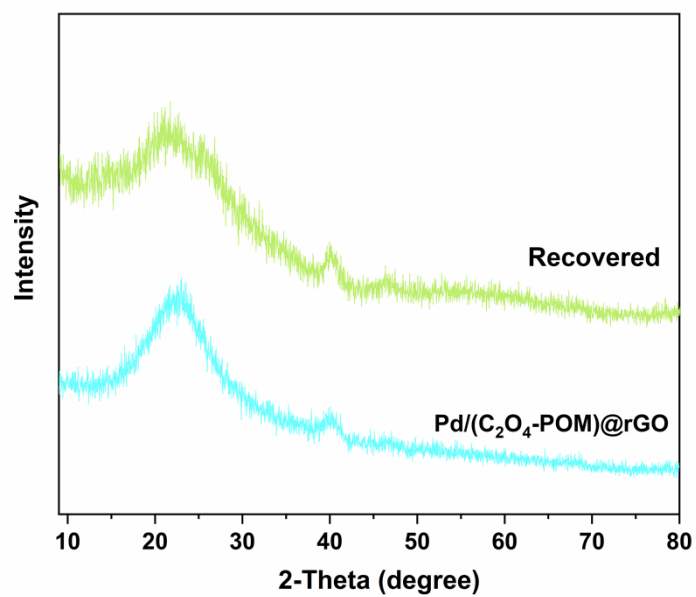

Figure S17. Powder XRD patterns of  $\text{Pd}/(\text{C}_2\text{O}_4\text{-POM})@\text{rGO}$  before and after catalysis.

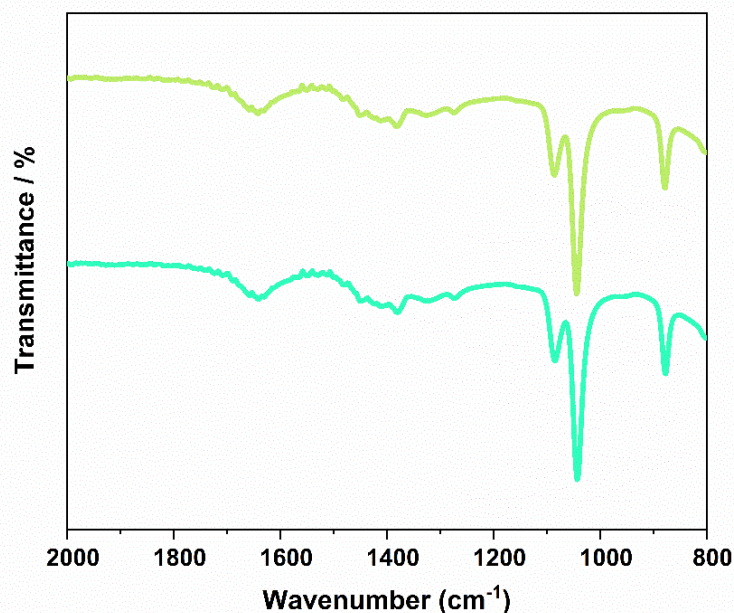

**Figure S18.** IR spectra of Pd/(C<sub>2</sub>O<sub>4</sub>-POM)@rGO before and after catalysis.

## S8 Computational details

Density functional theory (DFT) calculations were performed using the Vienna ab initio package (VASP)<sup>8-11</sup> in virtue of the Perdew-Burke-Ernzerhof (PBE) formulation within the generalized gradient approximation (GGA)<sup>12</sup>. The ion-electron interactions were modeled using the projector-augmented wave (PAW)<sup>13</sup> method. A plane-wave basis was used to expand the Kohn-Sham orbitals, truncated at a kinetic energy of 400 eV. The dispersion-corrected vdW-D3 functional was considered to evaluate the van der Waals effect<sup>14</sup>. The convergence criteria were set to be 10<sup>-4</sup> eV and 0.03 eV/Å for wavefunction and geometry optimization, respectively. The Brillouin zone integration is performed using 2 × 2 × 1 Monkhorst-Pack k-point sampling for a structure. Periodic images of the slab were separated by at least 15 Å vacuum gap. The electronic density of the structure was processed using VASPKIT<sup>15</sup>, and the density derived electrostatic and chemical (DDEC) charges and bond orders of the structure were calculated using the Chgemo software<sup>16,17</sup>.

## S9 References

1. S. Li, S. Liu, S. Liu, Y. Liu, Q. Tang, Z. Shi, S. Ouyang and J. Ye, {Ta<sub>12</sub>}/{Ta<sub>16</sub>} Cluster-Containing Polyantalotungstates with Remarkable Photocatalytic H<sub>2</sub> Evolution Activity, *J. Am. Chem. Soc.*, 2012, **134**, 19716-19721.
2. M. Filowitz, R. K. C. Ho, W. G. Klemperer, and W. Shum, Oxygen-17 nuclear magnetic resonance spectroscopy of polyoxometalates. 1. Sensitivity and resolution, *Inorg. Chem.*, 1979, **18**, 93-103.
3. W. J. Randall, M. W. Droege, N. Mizuno, K. Nomiya, T. J. R. Weakley, R. G. Finke, Metal Complexes of the Lacunary Heteropolytungstates [B-α-PW<sub>9</sub>O<sub>34</sub>]<sup>9-</sup> and [α-P<sub>2</sub>W<sub>15</sub>O<sub>56</sub>]<sup>12-</sup>, *Inorg. Synth.*, 1997, **31**, 167-168.
4. R. Liu, S. Li, X. Yu, G. Zhang, S. Zhang, J. Yao and L. Zhi, A general green strategy for fabricating metal nanoparticles/polyoxometalate/graphene tri-component nanohybrids: enhanced electrocatalytic properties, *J. Mater. Chem.*, 2012, **22**, 3319-3322.
5. K. Guo, L. J. Rowland, L. H. Isherwood, G. Glodan and A. Baidak, Photon-induced synthesis of ultrafine metal nanoparticles on graphene as electrocatalysts: impact of functionalization and doping, *J. Mater. Chem. A*, 2020, **8**, 714-723.
6. G. Sheldrick, A short history of SHELX, *Acta Crystallogr. Section A*, 2008, **64**, 112-122.
7. O. V. Dolomanov, L. J. Bourhis, R. J. Gildea, J. A. K. Howard and H. Puschmann, OLEX2: a complete structure solution, refinement and analysis program, *J. Appl. Cryst.*, 2009, **42**, 339-341.
8. G. Kresse, J. Hafner, Ab initio molecular dynamics for liquid metals, *Phys. Rev. B*, 1993, **47**, 558-561.

9. G. Kresse, J. Hafner, Ab initio molecular-dynamics simulation of the liquid-metal-amorphous-semiconductor transition in germanium, *Phys. Rev. B*, 1994, **49**, 14251-14269.
10. G. Kresse, J. Furthmuller, Efficient Iterative Schemes for Ab Initio Total-Energy Calculations Using a Plane-Wave Basis Set. *Phys. Rev. B*, 1996, **54**, 11169–11186.
11. G. Kresse, J. Furthmuller, Efficiency of Ab-Initio Total Energy Calculations for Metals and Semiconductors Using a Plane-Wave Basis Set. *Comput. Mater. Sci.*, 1996, **6**, 15–50.
12. J. P. Perdew, K. Burke, M. Ernzerhof, Generalized Gradient Approximation Made Simple. *Phys. Rev. Lett.*, 1996, **77**, 3865–3868.
13. G. Kresse, D. Joubert, From Ultrasoft Pseudopotentials to the Projector Augmented-Wave Method. *Phys. Rev. B*, 1999, **59**, 1758–1775.
14. K. Lee, E. D. Murray, L. Kong, B. I. Lundqvist, D. C. Langreth, Higher-accuracy van der waals density functional, *Phys. Rev. B*, 2010, **82**, 081101.
15. V. Wang, N. Xu, J. C. Liu, G. Tang, W. T. Geng, VASPKIT: a user-friendly interface facilitating high-throughput computing and analysis using VASP code, *Comput. Phys. Commun.*, 2021, **267**, 108033.
16. T. A. Manz, N. G. Limas, Introducing DDEC6 atomic population analysis: part 1. Charge partitioning theory and methodology, *RSC. Adv.*, 2016, **6**, 47771-47801.
17. T. A. Manz, Introducing DDEC6 atomic population analysis: part 3. Comprehensive method to compute bond orders, *RSC Adv.*, 2017, **7**, 45552-45581.
